# Supplementary material for: In silico screening and computational evaluation of novel promising USP14 inhibitors targeting the palm–thumb pocket
Source: Royal Society of Chemistry journal article supplement (doi:10.1039/d3cp02537c), 2023-01-01
Supplement: d3cp02537c1.pdf [file d3cp02537c1.pdf]

## **In silico screening and computational evaluation of novel promising USP14 inhibitors targeting the palm-thumb pocket**

Tianhao Wang<sup>1,2</sup>, Jianbo Tong<sup>1,\*</sup>, Xing Zhang<sup>1,2</sup>, Hao Luo<sup>2</sup>, Lei Xu<sup>3</sup>, Zhe Wang<sup>2,\*</sup>

<sup>1</sup>College of Chemistry and Chemical Engineering, Shaanxi University of Science and Technology, Xi'an 710021, P. R. China

<sup>2</sup>Innovation Institute for Artificial Intelligence in Medicine of Zhejiang University, College of Pharmaceutical Sciences, Zhejiang University, Hangzhou 310058, Zhejiang, P. R. China

<sup>3</sup>Institute of Bioinformatics and Medical Engineering, School of Electrical and Information Engineering, Jiangsu University of Technology, Changzhou 213001, China

### **Corresponding authors:**

**Jianbo Tong**

E-mail: [jianbotong@aliyun.com](mailto:jianbotong@aliyun.com)

**Zhe Wang**

E-mail: [wangzhehyd@zju.edu.cn](mailto:wangzhehyd@zju.edu.cn)

**Table S1.** Cross Prime MM-GBSA re-scoring of inhibitors with crystal structures

| Ligand<br>Protein |        |        |         |         |
|-------------------|--------|--------|---------|---------|
|                   | IU1    | IU1-47 | IU1-206 | IU1-248 |
| 6IIK              | -61.45 | -52.29 | -51.37  | -48.68  |
| 6IIL              | -58.00 | -51.29 | -49.64  | -54.72  |
| 6IIM              | -60.08 | -50.66 | -51.62  | -46.18  |
| 6IIN              | -56.67 | -55.34 | -63.39  | -52.83  |

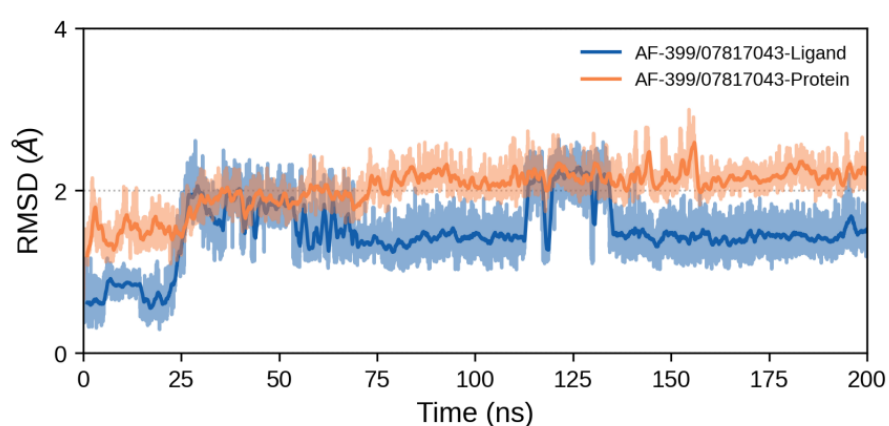

**Figure S1.** RMSD of the complex of ligand AF-399/07817043 and 6IIL throughout the time of MD simulations

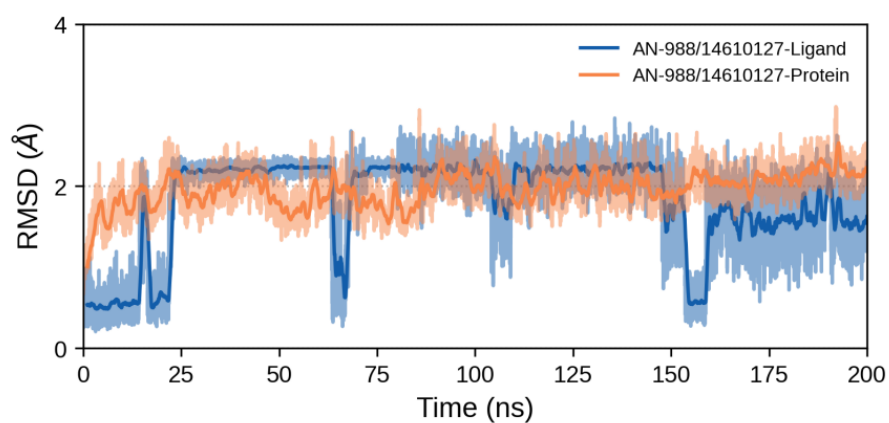

**Figure S2.** RMSD of the complex of ligand AN-988/14610127 and 6IIL throughout the time of MD simulations

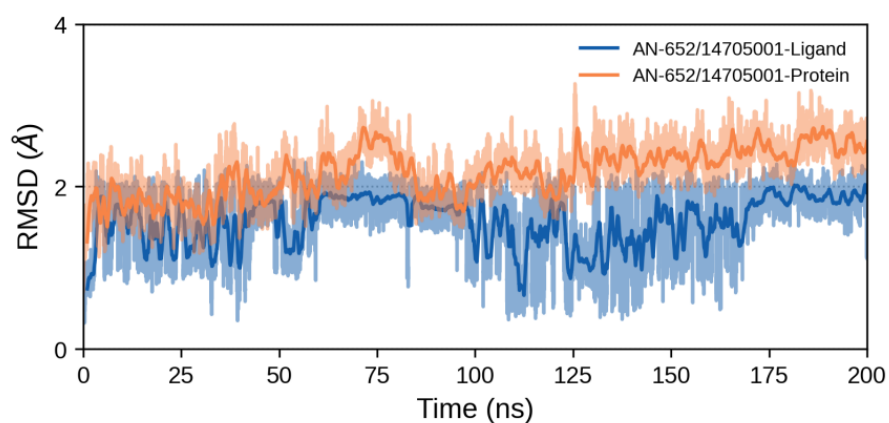

**Figure S3.** RMSD of the complex of ligand AN-652/14705001 and 6IIL throughout the time of MD simulations

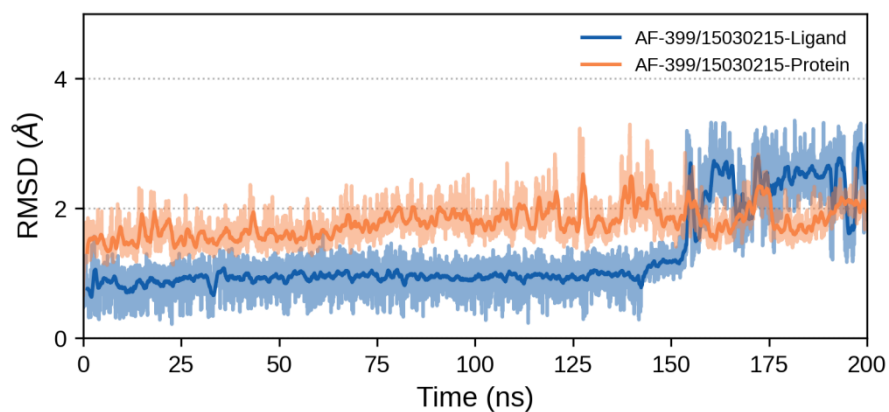

**Figure S4.** RMSD of the complex of ligand AF-399/15030215 and 6IIL throughout the time of MD simulations

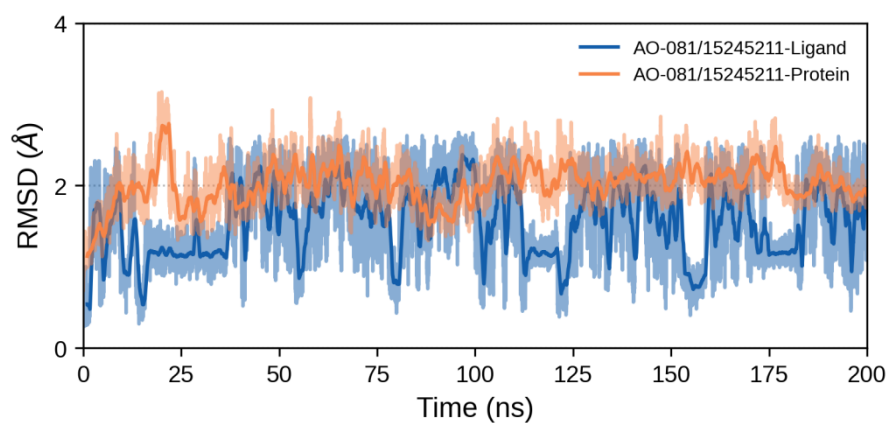

**Figure S5.** RMSD of the complex of ligand AO-081/15245211 and 6IIL throughout the time of MD simulations

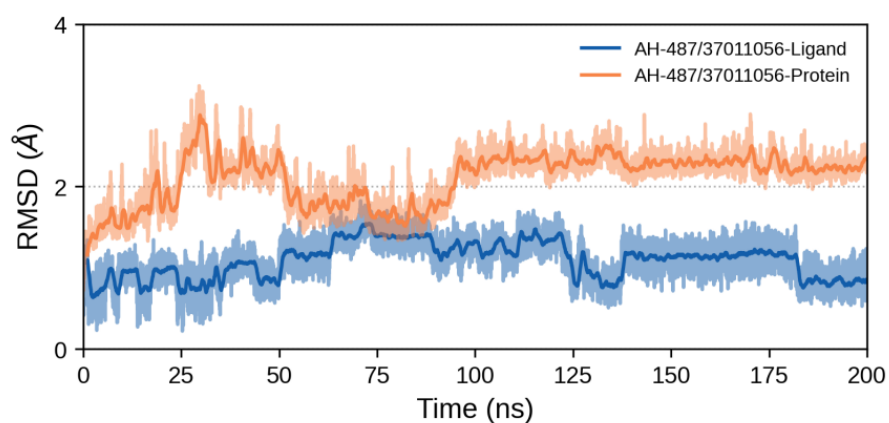

**Figure S6.** RMSD of the complex of ligand AH-487/37011056 and 6IIL throughout the time of MD simulations

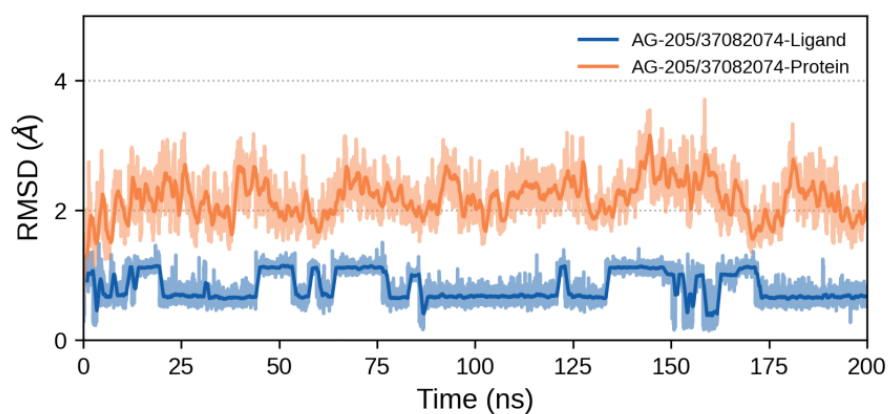

**Figure S7.** RMSD of the complex of ligand AG-205/37082074 and 6IIL throughout the time of MD simulations

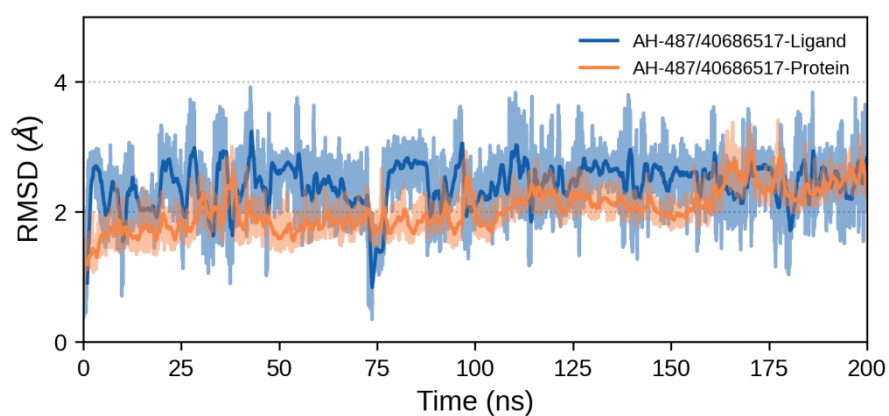

**Figure S8.** RMSD of the complex of ligand AH-487/40686517 and 6IIL throughout the time of MD simulations

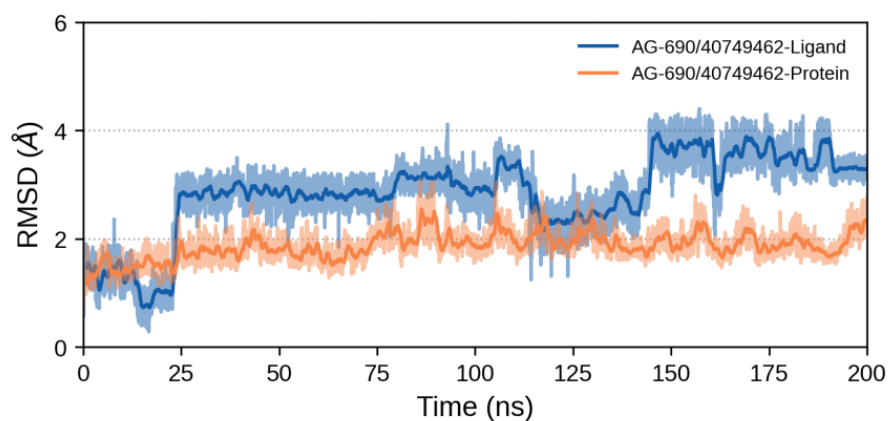

**Figure S9.** RMSD of the complex of ligand AG-690/40749462 and 6IIL throughout the time of MD simulations

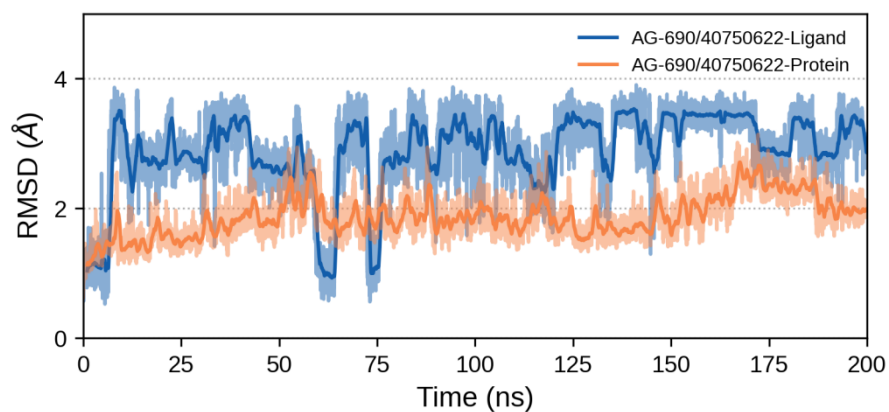

**Figure S10.** RMSD of the complex of ligand AG-690/40750622 and 6IIL throughout the time of MD simulations

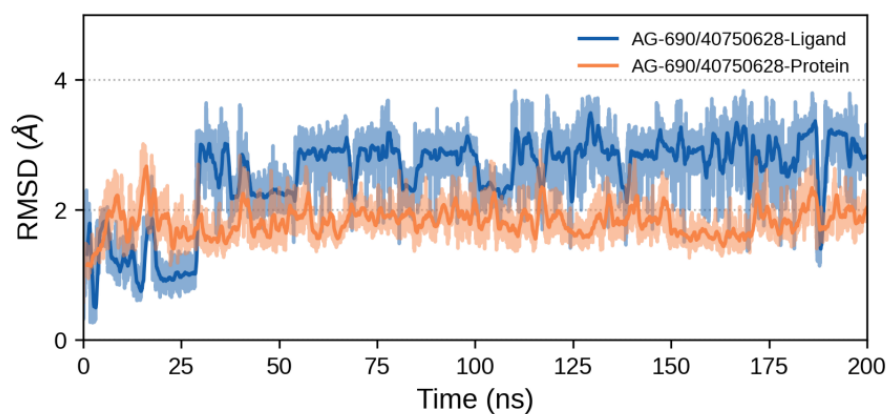

**Figure S11.** RMSD of the complex of ligand AG-690/40750628 and 6IIL throughout the time of MD simulations

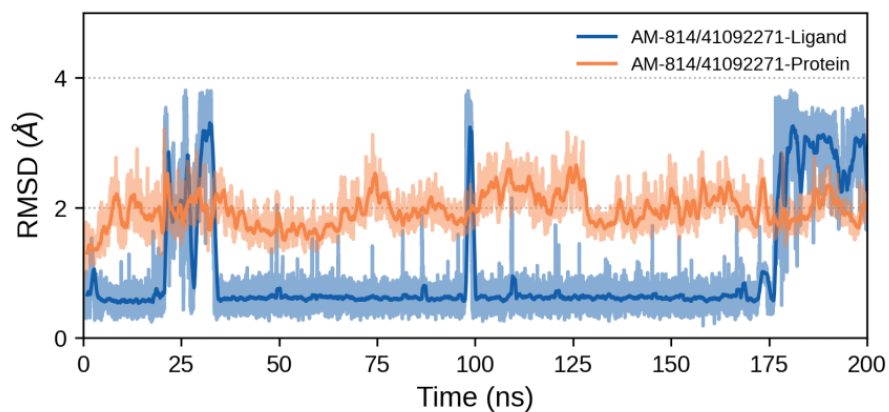

**Figure S12.** RMSD of the complex of ligand AM-814/41092271 and 6IIL throughout the time of MD simulations

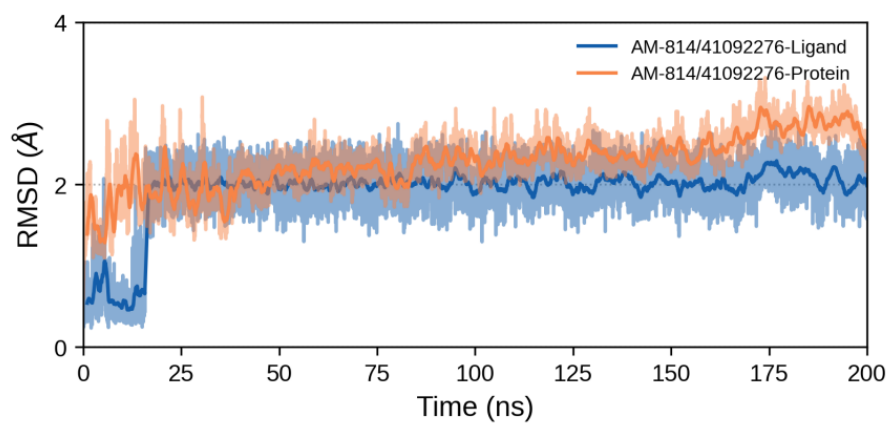

**Figure S13.** RMSD of the complex of ligand AM-814/41092276 and 6IIL throughout the time of MD simulations

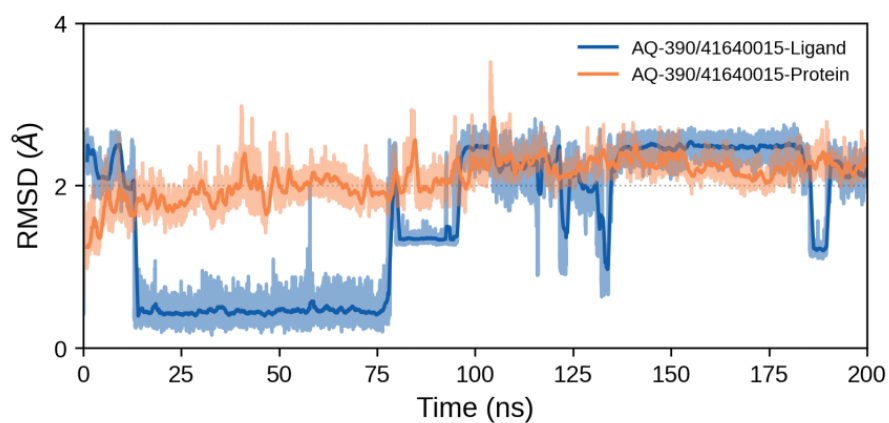

**Figure S14.** RMSD of the complex of ligand AQ-390/41640015 and 6IIL throughout the time of MD simulations

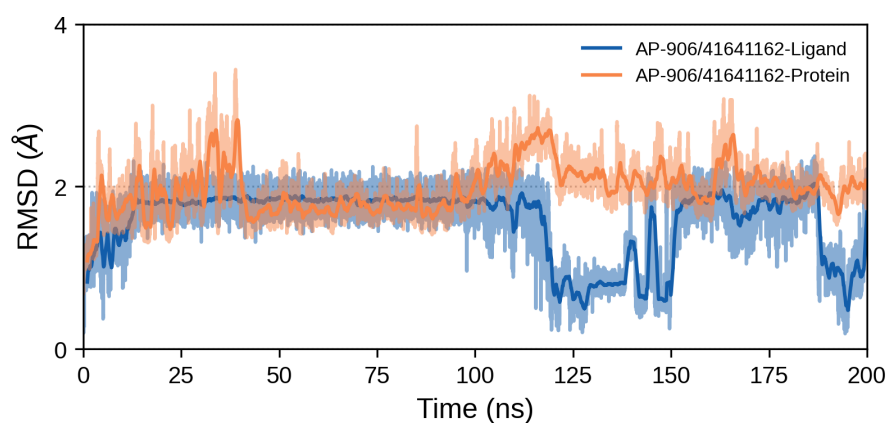

**Figure S15.** RMSD of the complex of ligand AP-906/41641162 and 6IIL throughout the time of MD simulations

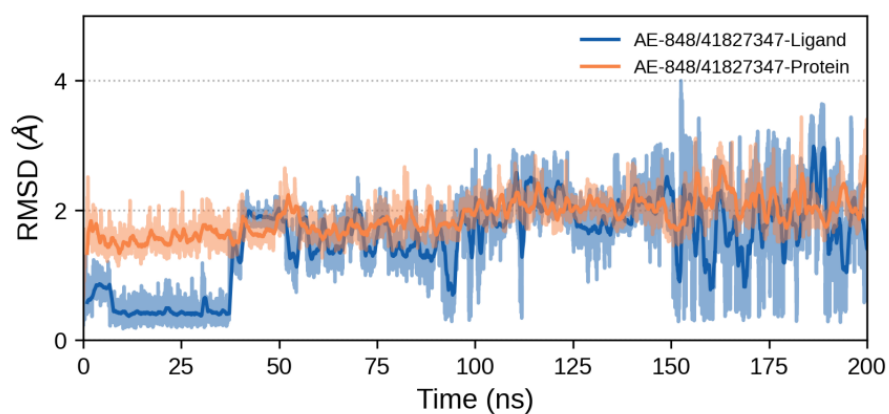

**Figure S16.** RMSD of the complex of ligand AE-848/41827347 and 6IIL throughout the time of MD simulations

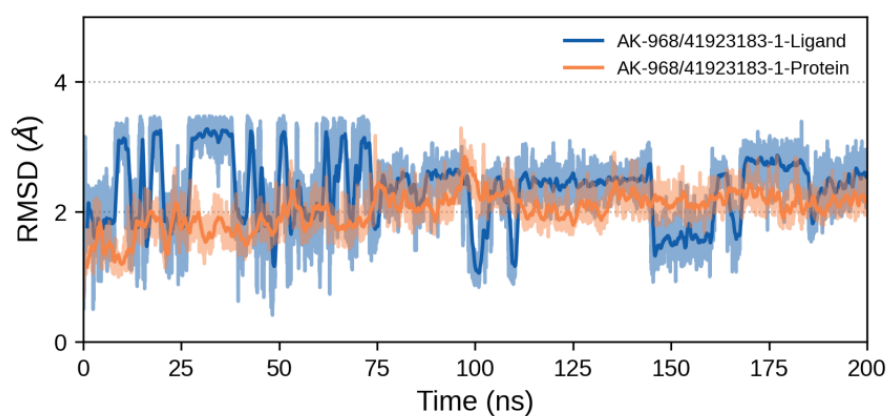

**Figure S17.** RMSD of the complex of ligand AK-968/41923183-1 and 6IIL throughout the time of MD simulations

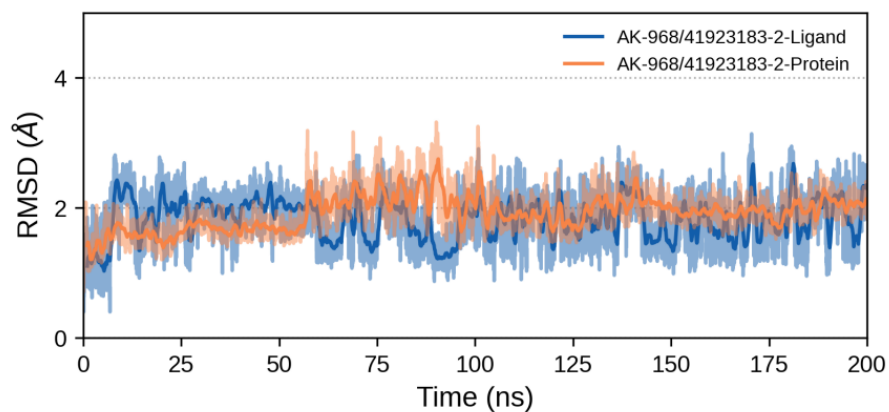

**Figure S18.** RMSD of the complex of ligand AK-968/41923183-2 and 6IIL throughout the time of MD simulations

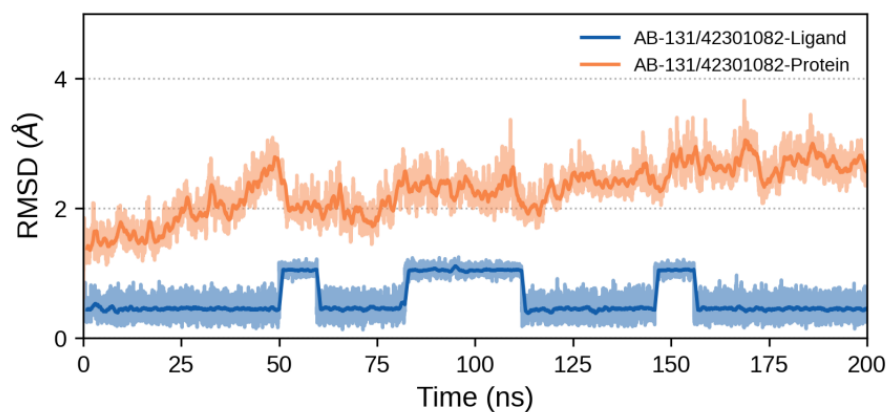

**Figure S19.** RMSD of the complex of ligand AB-131/42301082 and 6IIL throughout the time of MD simulations

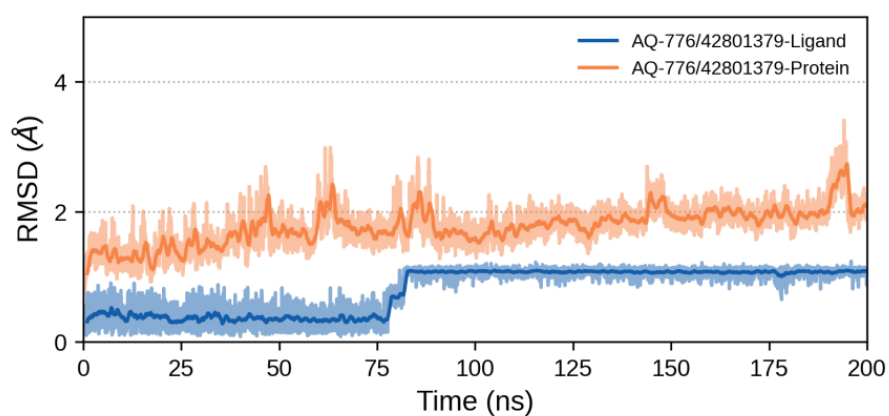

**Figure S20.** RMSD of the complex of ligand AQ-776/42801379 and 6IIL throughout the time of MD simulations

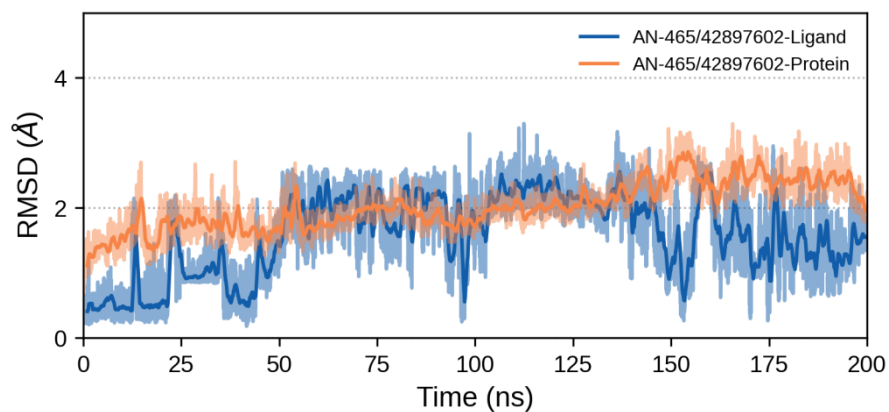

**Figure S21.** RMSD of the complex of ligand AN-465/42897602 and 6IIL throughout the time of MD simulations

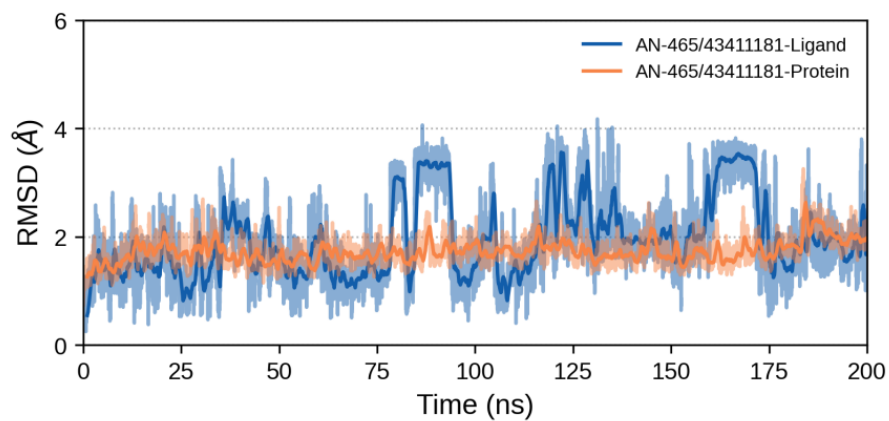

**Figure S22.** RMSD of the complex of ligand AN-465/43411181 and 6IIL throughout the time of MD simulations

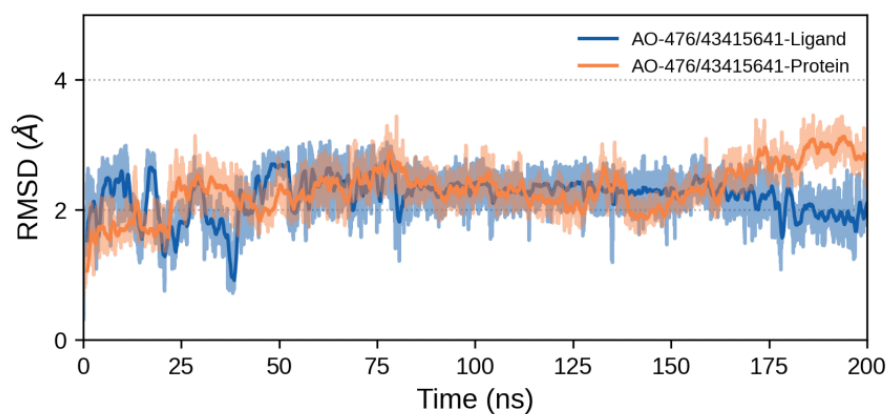

**Figure S23.** RMSD of the complex of ligand AO-476/43415641 and 6IIL throughout the time of MD simulations

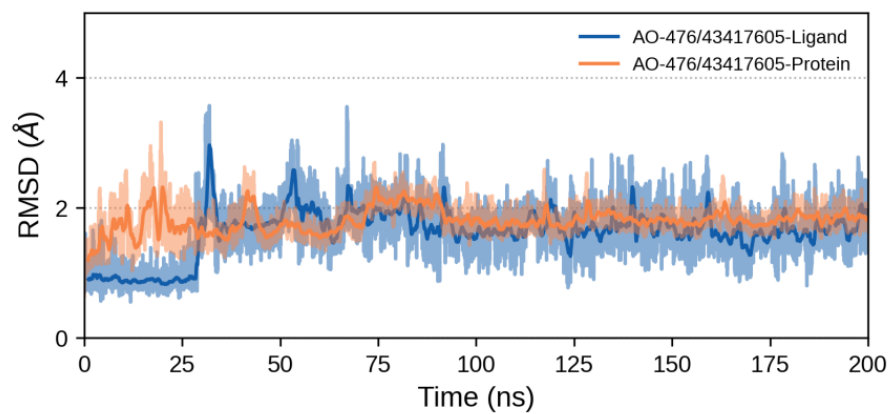

**Figure S24.** RMSD of the complex of ligand AO-476/43417605 and 6IIL throughout the time of MD simulations
